# Supplementary material for: The effect of host structure on the selectivity and mechanism of supramolecular catalysis of Prins cyclizations
Source: PubMed Central journal article supplement (PMC5811099; doi:10.1039/c4sc02735c), 2014-11-28
Supplement: SC-006-C4SC02735C-s001.pdf [file SC-006-C4SC02735C-s001.pdf]

## Supporting Information

### The Effect of Host Structure on the Selectivity and Mechanism of Supramolecular Catalysis of Prins Cyclizations

William M. Hart-Cooper, Chen Zhao, Rebecca M. Triano, Parastou Yaghoubi, Haxel Lionel Ozores, Kristen N. Burford, F. Dean Toste,\* Robert G. Bergman,\* and Kenneth N. Raymond\*

Department of Chemistry, University of California, Berkeley, CA 94720 and  
Chemistry Division, Lawrence Berkeley National Laboratory, Berkeley, CA, 94720, USA

#### Table of Contents Page

1. Dependence of  $k_{\text{obs}}$  on substrate concentration (**5c**, host **2**); order in **5c** (S2)
2. Dependence of  $k_{\text{obs}}$  on host concentration (**5c**, host **1**); order in **1** (S3)
3. Dependence of  $k_{\text{obs}}$  on  $\text{D}^+$  concentration (**5c**, host **1**); order in  $\text{D}^+$  (S4)

1. Relationship between observed rate of cyclization ( $k_{obs}$ ) versus the concentrations of added substrate.

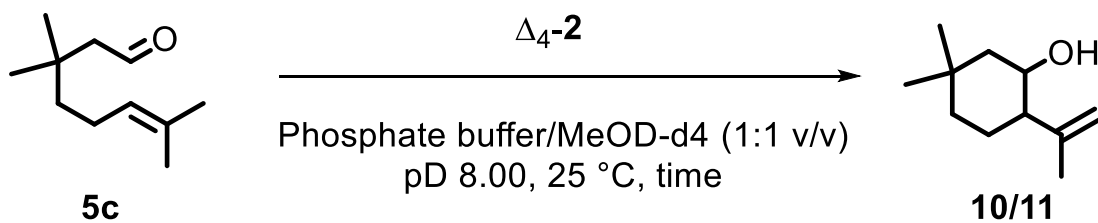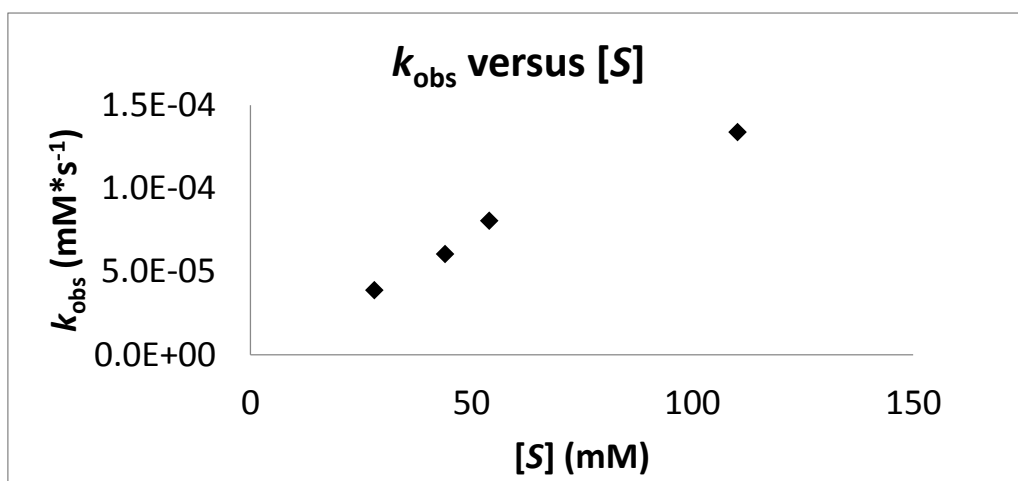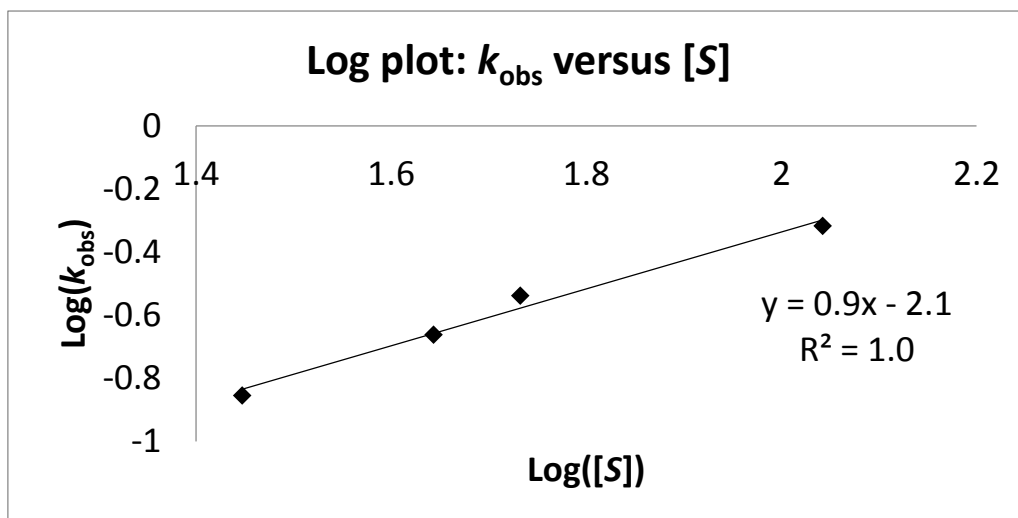

**Figure S1.** Top: relationship between  $k_{obs}$  on substrate concentration ( $[S]$ ). Below: log plot of the same data.

2. Relationship between observed rate of cyclization ( $k_{\text{obs}}$ ) versus the concentrations of added substrate.

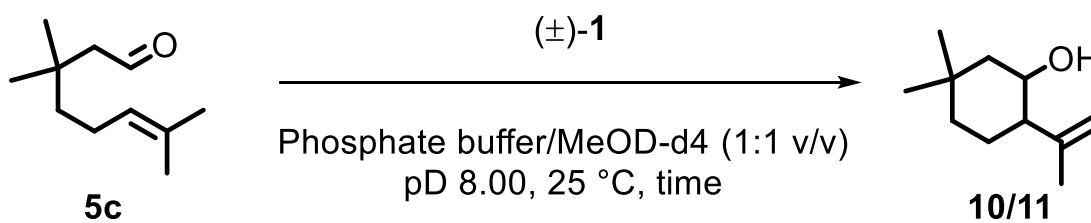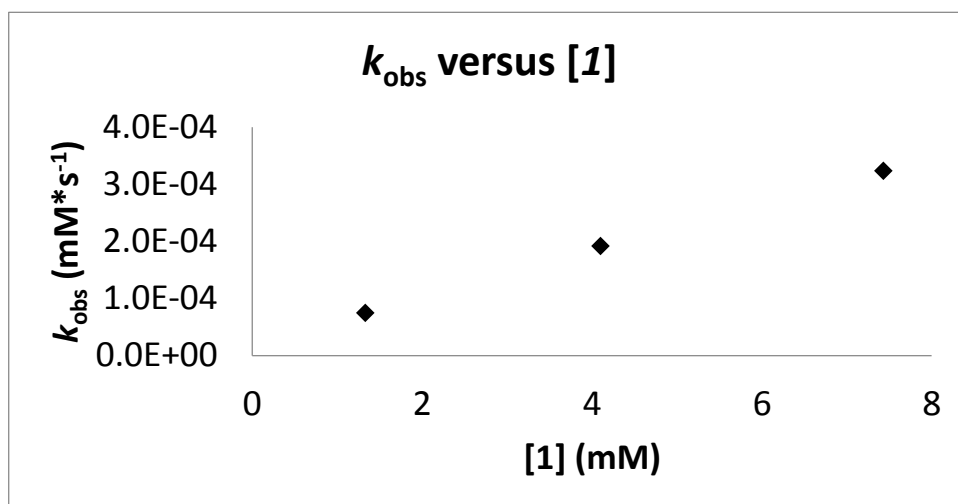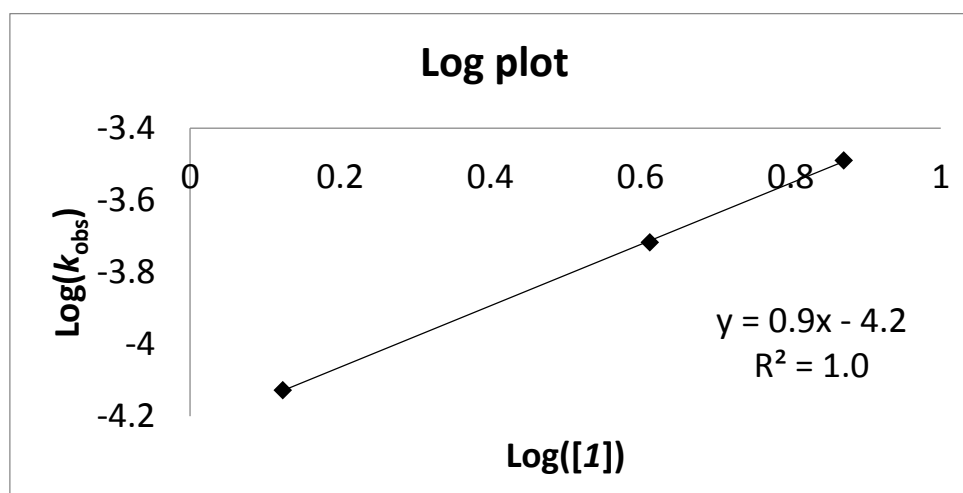

**Figure S2.** Top: relationship between  $k_{\text{obs}}$  on host concentration ([1]). Below: log plot of the same data.

3. Relationship between observed rate of cyclization ( $k_{\text{obs}}$ ) versus the concentrations of added substrate.

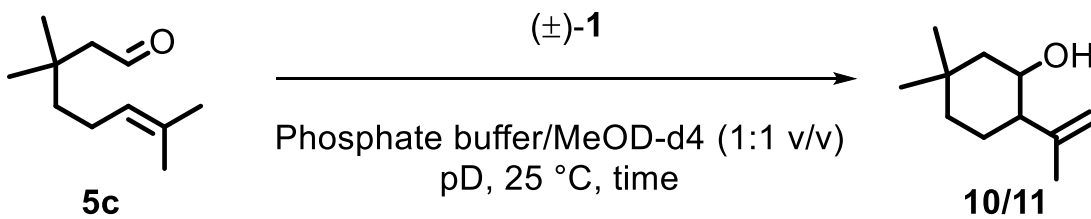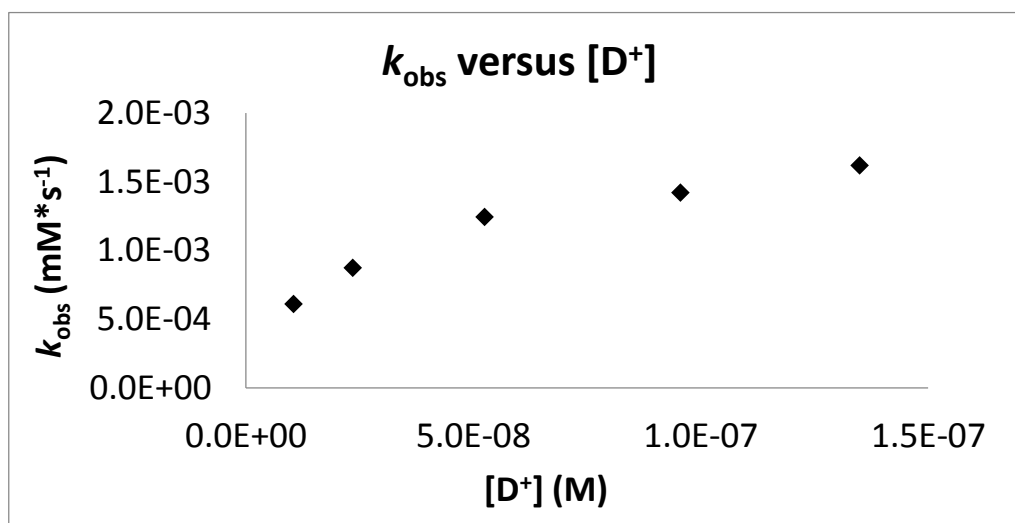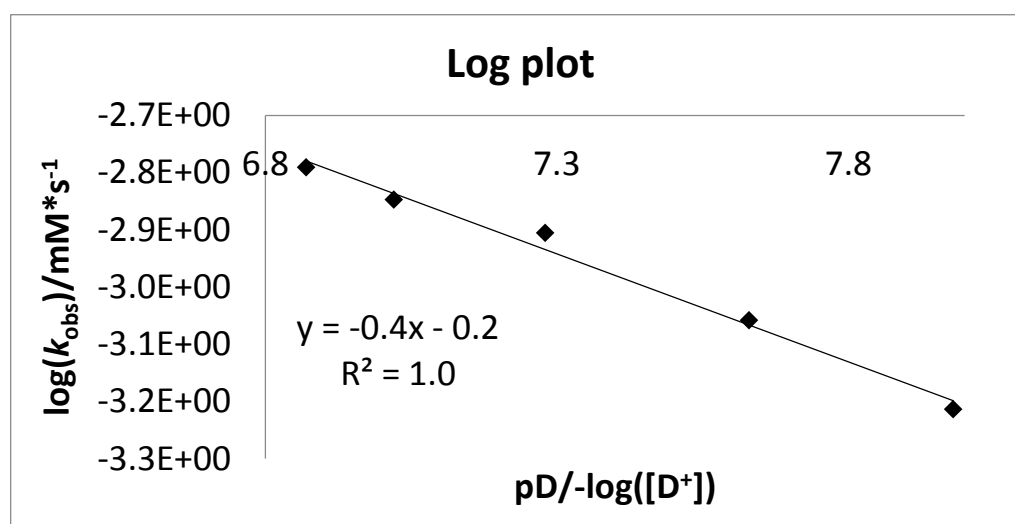

**Figure S3.** Top: relationship between  $k_{\text{obs}}$  on bulk solution acidity ( $[D^+]$ ). Below: log plot of the same data.
